# Supplementary material for: How to improve hospital admission screening for patients at risk of multidrug-resistant organism carriage: a before-and-after interventional study and cost-effectiveness analysis
Source: PubMed Central journal article supplement — BMJ Open Qual. 2022 Apr 27;11(2):e001699. doi: 10.1136/bmjoq-2021-001699 (PMC9052048; doi:10.1136/bmjoq-2021-001699), 2022-04-27
Supplement: bmjoq-2021-001699supp002.pdf [file bmjoq-2021-001699supp002.pdf]

**Table S1. Multidrug-resistant organisms to be screened systematically at admission to the emergency department at the Geneva University Hospitals, Switzerland, and correct answers of respondents**

|                                                               | Guideline    | Correct answers |
|---------------------------------------------------------------|--------------|-----------------|
|                                                               |              | N (%)           |
| Methicillin resistant <i>Staphylococcus aureus</i>            | Screened     | 101 (74.3)      |
| Vancomycin-resistant enterococcus                             | Screened     | 61 (44.9)       |
| Extended-spectrum beta-lactamase-producing enterobacteriaceae | Screened     | 94 (69.1)       |
| Carbapenem-resistant enterobacteriaceae                       | Screened     | 19 (14.0)       |
| <i>Clostridium difficile</i>                                  | Not screened | 14 (10.3)       |
| Resistant <i>Acinetobacter baumannii</i>                      | Screened     | 34 (25.0)       |
| <i>Pseudomonas aeruginosa</i>                                 | Not screened | 9 (6.6)         |
| <i>Legionella pneumophila</i>                                 | Not screened | 7 (5.1)         |
| HIV                                                           | Not screened | 3 (2.2)         |
| <i>Candida albicans</i>                                       | Not screened | 5 (3.7)         |
| <i>Serratia marcescens</i>                                    | Not screened | 0 (0)           |
