# Supplementary material for: How to improve hospital admission screening for patients at risk of multidrug-resistant organism carriage: a before-and-after interventional study and cost-effectiveness analysis
Source: PubMed Central journal article supplement — BMJ Open Qual. 2022 Apr 27;11(2):e001699. doi: 10.1136/bmjoq-2021-001699 (PMC9052048; doi:10.1136/bmjoq-2021-001699), 2022-04-27
Supplement: bmjoq-2021-001699supp004.pdf [file bmjoq-2021-001699supp004.pdf]

**Table 3. Characteristics related to knowledge of MDRO screening**

|                                               | MDRO prevalence is $\geq 60\%$ |         | Know all MDROs to be screened systematically |         | Know the three IPC measures to avoid cross-transmission |         |
|-----------------------------------------------|--------------------------------|---------|----------------------------------------------|---------|---------------------------------------------------------|---------|
|                                               | N (%)                          | p-value | N (%)                                        | p-value | N (%)                                                   | p-value |
| MDRO screening is a task of the ED            |                                | <0.001  |                                              | 0.320   |                                                         | 0.098   |
| Fully agree                                   | 6 (24.0)                       |         | 4 (15.4)                                     |         | 4 (15.4)                                                |         |
| Mostly agree                                  | 8 (16.0)                       |         | 3 (5.8)                                      |         | 12 (23.1)                                               |         |
| Mostly disagree                               | 1 (4.5)                        |         | 3 (13.0)                                     |         | 6 (26.1)                                                |         |
| Fully disagree                                | 0 (0.0)                        |         | 0 (0.0)                                      |         | 6 (60.0)                                                |         |
| Perception of screening priority              |                                | 0.063   |                                              | 0.822   |                                                         | 0.216   |
| High                                          | 6 (18.8)                       |         | 2 (5.7)                                      |         | 7 (20.0)                                                |         |
| Moderate                                      | 8 (13.8)                       |         | 6 (10.2)                                     |         | 17 (28.8)                                               |         |
| Low                                           | 0 (0.0)                        |         | 2 (10.0)                                     |         | 8 (40.0)                                                |         |
| Number of years of in your current profession |                                | 0.466   |                                              | 0.551   |                                                         | 0.217   |
| 1-2                                           | 0 (0)                          |         | 1 (25.0)                                     |         | 3 (75.0)                                                |         |
| 3-5                                           | 1 (5.9)                        |         | 2 (10.5)                                     |         | 5 (26.3)                                                |         |
| 6-10                                          | 6 (23.1)                       |         | 2 (7.7)                                      |         | 6 (23.1)                                                |         |
| $\geq 11$ years                               | 8 (10.5)                       |         | 5 (5.8)                                      |         | 22 (25.6)                                               |         |
| Number of years in the hospital               |                                | 0.441   |                                              | 0.999   |                                                         | 0.021   |
| < 1                                           | 0 (0)                          |         | 0 (0)                                        |         | 2 (66.7)                                                |         |
| 1-2                                           | 0 (0)                          |         | 1 (8.3)                                      |         | 7 (58.3)                                                |         |
| 3-5                                           | 3 (12.5)                       |         | 2 (7.7)                                      |         | 3 (11.5)                                                |         |
| 6-10                                          | 12 (14.0)                      |         | 7 (7.4)                                      |         | 24 (25.5)                                               |         |
| Specialized training in emergency care        |                                | 0.427   |                                              | 0.802   |                                                         | 0.392   |
| Yes                                           | 6 (9.8)                        |         | 4 (6.3)                                      |         | 18 (28.6)                                               |         |
| No                                            | 3 (7.7)                        |         | 4 (8.7)                                      |         | 13 (28.3)                                               |         |
| Ongoing                                       | 4 (23.5)                       |         | 2 (10.5)                                     |         | 3 (15.8)                                                |         |
| Not applicable                                | 2 (28.6)                       |         | 0 (0.0)                                      |         | 2 (28.6)                                                |         |
| Course in infection prevention                |                                | 0.091   |                                              |         |                                                         | 0.136   |

|                                                              |           |       |    |  |           |       |
|--------------------------------------------------------------|-----------|-------|----|--|-----------|-------|
| No                                                           | 2 (6.5)   |       | () |  | 6 (19.4)  |       |
| Yes                                                          | 13 (15.3) |       | () |  | 27 (30.7) |       |
| Participation in working group, committee in risk management |           | 0.964 |    |  |           | 0.462 |
| Yes, I am currently participating                            | 2 (15.4)  |       | () |  | 3 (23.1)  |       |
| Yes, in the past, but I am not currently participating       | 1 (6.7)   |       | () |  | 31 (29.2) |       |
| No                                                           | 12 (12.6) |       | () |  | 2 (12.5)  |       |

MDRO= multidrug-resistant organisms; IPC= infection prevention and control; ED= emergency department

<sup>1</sup> Exact chi square

**Table 4. Cost comparison of the clinical audit and the automated indicator in two phases of the intervention (development and continuous monitoring)**

|                                                            | Audit                                                              | Automated indicator                                                      |
|------------------------------------------------------------|--------------------------------------------------------------------|--------------------------------------------------------------------------|
| <i>Cost of the development phase</i>                       |                                                                    |                                                                          |
| Human resources                                            | 1 person 200 hr                                                    | 1 person 310 hr                                                          |
| Material and equipment                                     | Audit feedback calculation and form                                | Existing framework for data extraction                                   |
| Training and classes                                       | Courses: 18 hr<br>Classroom: 10 hr<br>Preparation: 8 hr            | Team presentations: 10 hr                                                |
| Organization                                               | 2 people: 20 hr<br>Meetings: 10 hr and 10 hr more with preparation | 4 people: 100 hr<br>20 meetings: 60 hr<br>Checking of 400 folders: 40 hr |
| Total of the development phase                             | 13,924 USD                                                         | 18,290 USD                                                               |
| <i>Cost of the continuous monitoring phase<sup>a</sup></i> |                                                                    |                                                                          |
| Human resources                                            | 1 person 178 hr                                                    | 1 person 8 hr                                                            |
| Material and equipment                                     | Audit feedback calculation and form                                | Existing framework for data extraction                                   |
| Team presentations                                         | 1 person 5 hr                                                      | 1 person 5 hr                                                            |
| Organization and preparation                               | 1 person 3 hr                                                      | 1 person 3 hr                                                            |
| Total monthly costs for continuous monitoring              | 10,961 USD                                                         | 944 USD                                                                  |
| Total yearly costs for continuous monitoring               | 131,531 USD                                                        | 11,328 USD                                                               |

Time-based salary= 59 USD/hr

<sup>a</sup> for a 1-month monitoring of 200 cases
