# Supplementary figures and images for: How to improve hospital admission screening for patients at risk of multidrug-resistant organism carriage: a before-and-after interventional study and cost-effectiveness analysis
Source: PubMed Central journal article supplement — BMJ Open Qual. 2022 Apr 27;11(2):e001699. doi: 10.1136/bmjoq-2021-001699 (PMC9052048; doi:10.1136/bmjoq-2021-001699), 2022-04-27

**S Figure 1.**

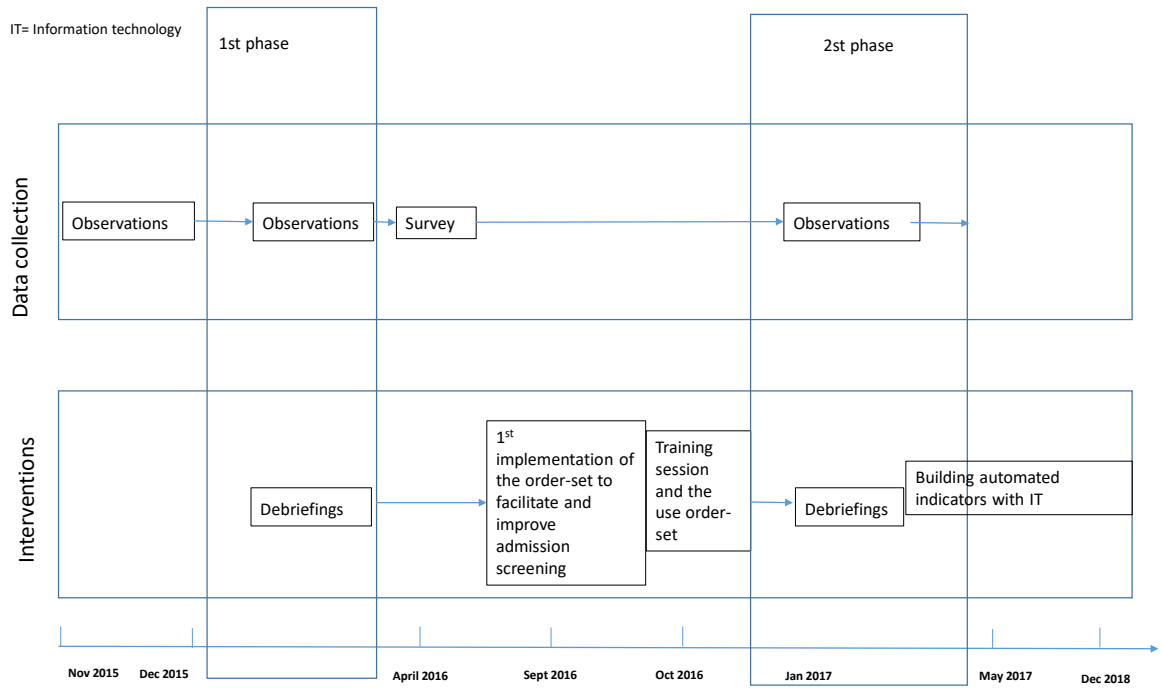

Supplement: bmjoq-2021-001699supp003.pdf [file bmjoq-2021-001699supp003.pdf]
